# Supplementary material for: Non-enzymatic glucose sensing by enhanced Raman spectroscopy on flexible ‘as-grown’ CVD graphene
Source: Royal Society of Chemistry journal article supplement (doi:10.1039/c5an00546a), 2015-01-01
Supplement: c5an00546a1.pdf [file c5an00546a1.pdf]

## Supporting Information:

### Non-enzymatic glucose sensing by enhanced Raman spectroscopy on flexible 'as-grown' CVD graphene

Surojit Chattopadhyay,<sup>\*a,b</sup> Mau-Shiun Li,<sup>a</sup> Pradip Kumar Roy,<sup>a</sup> C. T. Wu<sup>c</sup>

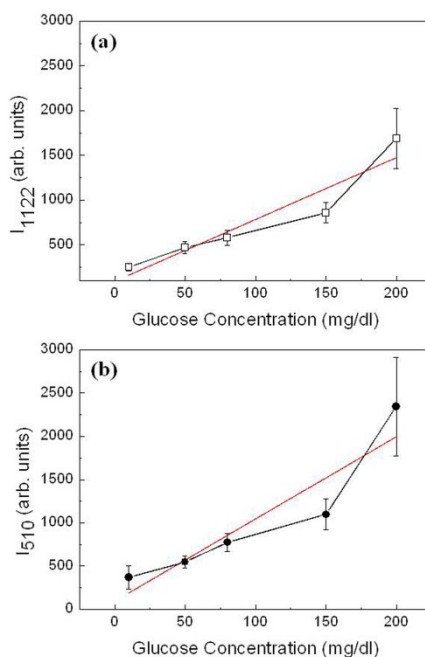

Fig. S1. Variation of the GERS intensity (I) of the (a) 1122, and (b) 510  $\text{cm}^{-1}$  line of glucose as a function of the glucose concentration, measured on graphene prepared with 20 sccm of methane. The line (black) joining the data points is a guide to the eye only. The other line (red) is a linear fit to the data with correlation coefficient of (a) 0.86, and (b) 0.82 suggesting an unsatisfactory fit.

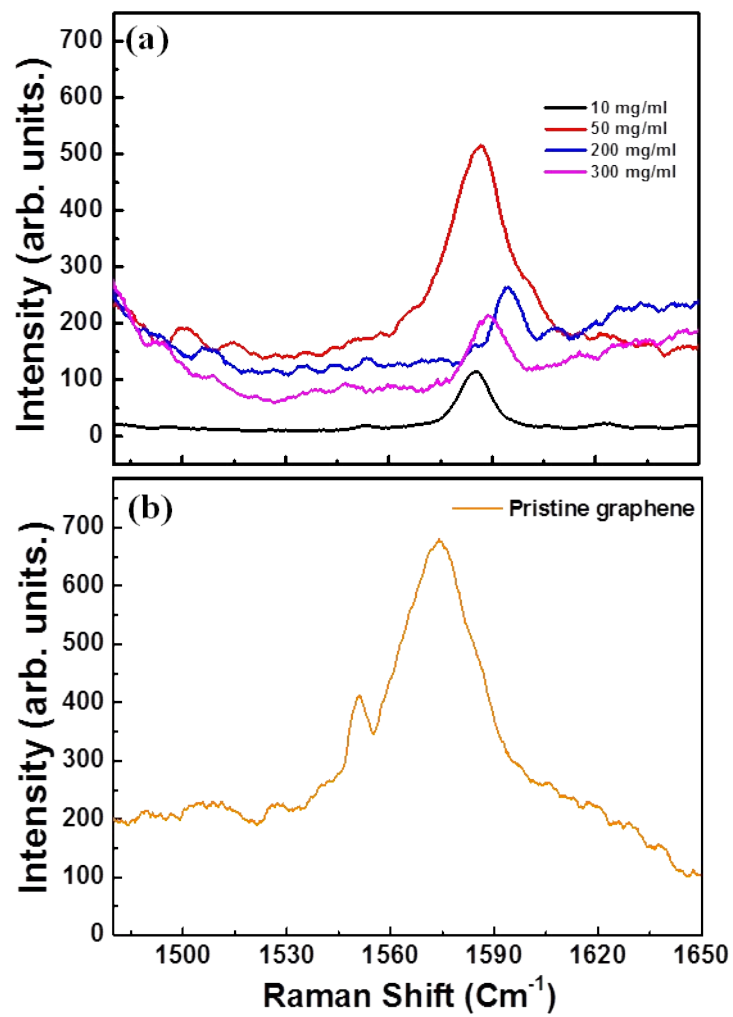

Figure S2 (a) Graphene G band shift with different concentration of Glucose dispersed on graphene; (b) G band on as-grown pristine graphene.
